# Supplementary material
Source: PubMed Central journal article supplement (PMC5783666)
Supplement: EHP541.s001.acco.pdf [file EHP541.s001.acco.pdf]

**Note to readers with disabilities:** *EHP* strives to ensure that all journal content is accessible to all readers. However, some figures and Supplemental Material published in *EHP* articles may not conform to [508 standards](#) due to the complexity of the information being presented. If you need assistance accessing journal content, please contact [ehp508@niehs.nih.gov](mailto:ehp508@niehs.nih.gov). Our staff will work with you to assess and meet your accessibility needs within 3 working days.

## **Supplemental Material**

# **Associations between Greenness, Impervious Surface Area, and Nighttime Lights on Biomarkers of Vascular Aging in Chennai, India**

Kevin J. Lane, Eleanor C. Stokes, Karen C. Seto, Sadagopan Thanikachalam, Mohan  
Thanikachalam, and Michelle L. Bell

### **Table of Contents**

**Table S1:** Correlation matrix between built environment measures and participant characteristics.

**Table S2:** Mean and standard deviation of greenness, ISA and NTL by demographic variables.

**Table S3:** Univariate linear regression model for effect of an interquartile range (IQR) increase in residential exposure to greenness (IQR = 0.17), ISA (IQR = 0.19) and NTL (IQR = 0.06 W/cm<sup>2</sup>/sr) on biomarkers of vascular aging.

**Table S4:** Multivariable regression model for effect of an interquartile range (IQR) increase in neighborhood (1 km buffer) exposure to greenness (IQR = 0.17), ISA (IQR = 0.19) and NTL (IQR = 0.06) on biomarkers of vascular aging.

**Figure S1:** Parsimonious multivariable regression model for effect of an interquartile range (IQR) increase in residential exposure to greenness (IQR = 0.17), ISA (IQR = 0.19) and NTL (0.06) measures on biomarkers of vascular aging.

**Figure S2:** Linear regression model for association between an interquartile range (IQR) increase in residential exposure to greenness (IQR = 0.17) on biomarkers of vascular aging stratified by low, moderate and high physical activity.

Table S1: Correlation matrix between built environment measures and participant characteristics.

| Variable  | ISA   | NTL   | NDVI  | Age   | Female | BMI   | FBS   | Sedentary | Smoke | Anxiety | SES |
|-----------|-------|-------|-------|-------|--------|-------|-------|-----------|-------|---------|-----|
| ISA       |       |       |       |       |        |       |       |           |       |         |     |
| NTL       | 0.62  |       |       |       |        |       |       |           |       |         |     |
| NDVI      | -0.74 | -0.65 |       |       |        |       |       |           |       |         |     |
| Age       | 0.03  | 0.01  | -0.02 |       |        |       |       |           |       |         |     |
| Female    | -0.02 | -0.01 | 0.05  | -0.20 |        |       |       |           |       |         |     |
| BMI       | 0.03  | 0.04  | 0.02  | 0.05  | 0.21   |       |       |           |       |         |     |
| FBS       | 0.02  | 0.00  | 0.00  | 0.21  | -0.02  | 0.04  |       |           |       |         |     |
| Sedentary | 0.06  | -0.05 | -0.07 | 0.20  | -0.02  | 0.12  | 0.08  |           |       |         |     |
| Smoke     | 0.03  | 0.04  | -0.03 | 0.04  | -0.34  | -0.11 | -0.03 | -0.04     |       |         |     |
| Anxiety   | 0.06  | 0.04  | -0.07 | 0.03  | 0.15   | 0.03  | 0.01  | 0.05      | -0.03 |         |     |
| SES       | 0.10  | 0.05  | -0.10 | 0.06  | -0.33  | 0.07  | 0.02  | 0.08      | 0.04  | -0.20   |     |

Body Mass Index (BMI); Fasting Blood Sugar (FBS); Impervious surface area ratio (ISA); Nighttime lights (NTL); Normalized difference vegetation index (NDVI); Socioeconomic status (SES).

Table S2: Mean and standard deviation of greenness, ISA and NTL by demographic variables.

| <b>Characteristics</b>                 | <b>ISA</b>  | <b>Greenness</b> | <b>NTL</b>  |
|----------------------------------------|-------------|------------------|-------------|
| <b>Gender</b>                          |             |                  |             |
| Female                                 | 0.64 (0.15) | 0.41 (0.12)      | 0.09 (0.04) |
| Male                                   | 0.64 (0.15) | 0.40 (0.12)      | 0.09 (0.04) |
| <b>Age (years)</b>                     |             |                  |             |
| < 40                                   | 0.64 (0.16) | 0.41 (0.12)      | 0.09 (0.04) |
| 40-50                                  | 0.63 (0.12) | 0.42 (0.12)      | 0.09 (0.04) |
| 51-60                                  | 0.65 (0.15) | 0.40 (0.12)      | 0.10 (0.04) |
| 60 +                                   | 0.65 (0.13) | 0.41 (0.12)      | 0.10 (0.04) |
| <b>BMI (kg/m<sup>2</sup>)</b>          |             |                  |             |
| Underweight (<18.5)                    | 0.63 (0.18) | 0.40 (0.12)      | 0.09 (0.05) |
| Normal weight (18.5–22.9)              | 0.63 (0.16) | 0.42 (0.12)      | 0.09 (0.05) |
| Overweight (23–24.9)                   | 0.64 (0.15) | 0.41 (0.12)      | 0.09 (0.04) |
| Obese (25+)                            | 0.65 (0.15) | 0.41 (0.12)      | 0.09 (0.04) |
| <b>Socioeconomic score (Quartiles)</b> |             |                  |             |
| 1 <sup>st</sup>                        | 0.62 (0.17) | 0.42 (0.12)      | 0.09 (0.04) |
| 2 <sup>nd</sup>                        | 0.65 (0.15) | 0.42 (0.12)      | 0.09 (0.04) |
| 3 <sup>rd</sup>                        | 0.65 (0.14) | 0.40 (0.11)      | 0.10 (0.04) |
| 4 <sup>th</sup>                        | 0.66 (0.14) | 0.40 (0.11)      | 0.10 (0.04) |
| <b>Anxiety Score (Quartiles)</b>       |             |                  |             |
| 1 <sup>st</sup>                        | 0.61 (0.17) | 0.44 (0.12)      | 0.08 (0.04) |
| 2 <sup>nd</sup>                        | 0.65 (0.15) | 0.40 (0.12)      | 0.10 (0.04) |
| 3 <sup>rd</sup>                        | 0.66 (0.14) | 0.39 (0.11)      | 0.10 (0.04) |
| 4 <sup>th</sup>                        | 0.66 (0.14) | 0.40 (0.11)      | 0.10 (0.04) |
| <b>Physical Activity</b>               |             |                  |             |
| Low                                    | 0.65 (0.15) | 0.40 (0.11)      | 0.10 (0.04) |
| Moderate                               | 0.65 (0.15) | 0.41 (0.12)      | 0.09 (0.04) |
| High                                   | 0.50 (0.24) | 0.47 (0.12)      | 0.07 (0.05) |
| <b>Smoking Status</b>                  |             |                  |             |
| Smoker                                 | 0.65 (0.14) | 0.40 (0.12)      | 0.10 (0.04) |
| Non-smoker                             | 0.64 (0.16) | 0.41 (0.12)      | 0.9 (0.04)  |
| <b>Energy Intake</b>                   |             |                  |             |
| Excess                                 | 0.65 (0.14) | 0.40 (0.11)      | 0.10 (0.04) |
| Adequate                               | 0.64 (0.15) | 0.41 (0.12)      | 0.09 (0.04) |
| Deficit                                | 0.63 (0.16) | 0.42 (0.12)      | 0.09 (0.04) |

Body Mass Index (BMI); Impervious Surface Area (ISA); Normalized Difference Vegetation Index (NDVI); Nighttime Lights (NTL; units are in W/cm<sup>2</sup>/sr).

Table S3: Univariate linear regression model for effect of an interquartile range (IQR) increase in residential exposure to greenness (IQR = 0.17), ISA (IQR = 0.19) and NTL (IQR = 0.06 W/cm<sup>2</sup>/sr) on biomarkers of vascular aging.

|              | SBP (mmHg) <sup>(a)</sup><br>IQR (95%CI) | DBP (mmHg) <sup>(a)</sup><br>IQR (95%CI) | cPP (mmHg) <sup>(a)</sup><br>IQR (95%CI) | %FMD <sup>(b)</sup><br>IQR (95%CI) |
|--------------|------------------------------------------|------------------------------------------|------------------------------------------|------------------------------------|
| ISA          | 3.12 (2.18, 3.84)                        | 0.99 (0.52, 1.46)                        | 1.96 (1.34, 2.58)                        | -0.90 (-1.28, -0.51)               |
| NTL          | 3.46 (2.45, 4.48)                        | 1.10 (0.52, 1.67)                        | 1.29 (0.71, 1.87)                        | -1.23 (-1.67, -0.79)               |
| Inverse NDVI | 5.70 (4.36, 7.03)                        | 1.95 (1.20, 2.71)                        | 3.74 (2.74, 4.75)                        | -1.75 (-2.35, -1.15)               |

Impervious surface area ratio (ISA); Nighttime lights (NTL); Normalized difference vegetation index (NDVI); Systolic blood pressure (SBP); Diastolic blood pressure (DBP); central Pulse Pressure (cPP); Flow mediated dilatation (FMD).

Table S4: Multivariable regression model for effect of an interquartile range (IQR) increase in neighborhood (1 km buffer) exposure to greenness (IQR = 0.17), ISA (IQR = 0.19) and NTL (IQR = 0.06) on biomarkers of vascular aging.

|              | SBP (mmHg) <sup>(a)</sup><br>IQR (95%CI) | DBP (mmHg) <sup>(a)</sup><br>IQR (95%CI) | cPP (mmHg) <sup>(a)</sup><br>IQR (95%CI) | %FMD <sup>(b)</sup><br>IQR (95%CI) |
|--------------|------------------------------------------|------------------------------------------|------------------------------------------|------------------------------------|
| ISA          | 1.22 (0.47, 1.89)                        | 0.98 (0.27, 1.23)                        | 0.74 (0.32, 1.18)                        | -0.71 (-1.22, -0.39)               |
| NTL          | 0.66 (-0.09, 1.08)                       | 0.27 (0.03, 0.58)                        | 0.38 (0.02, 0.77)                        | -0.92 (-1.32, -0.54)               |
| Inverse NDVI | 3.71 (3.18, 4.10)                        | 1.18 (0.74, 1.62)                        | 3.28 (2.62, 3.89)                        | -1.03 (1.51, -0.72)                |

Impervious surface area ratio (ISA); Nighttime lights (NTL); Normalized difference vegetation index (NDVI); Systolic blood pressure (SBP); Diastolic blood pressure (DBP); central Pulse Pressure (cPP); Flow mediated dilatation (FMD). (a)Adjusted for age, gender, BMI, Fasting, LDL, sedentary score, smoking status, anxiety score and SES. (b)Adjusted for age, gender, BMI, Fasting, LDL, sedentary score, smoking status, anxiety score, SES and SBP.

Figure S1: Parsimonious multivariable regression model for effect of an interquartile range (IQR) increase in residential exposure to greenness (IQR = 0.17), ISA (IQR = 0.19) and NTL (0.06) measures on biomarkers of vascular aging.

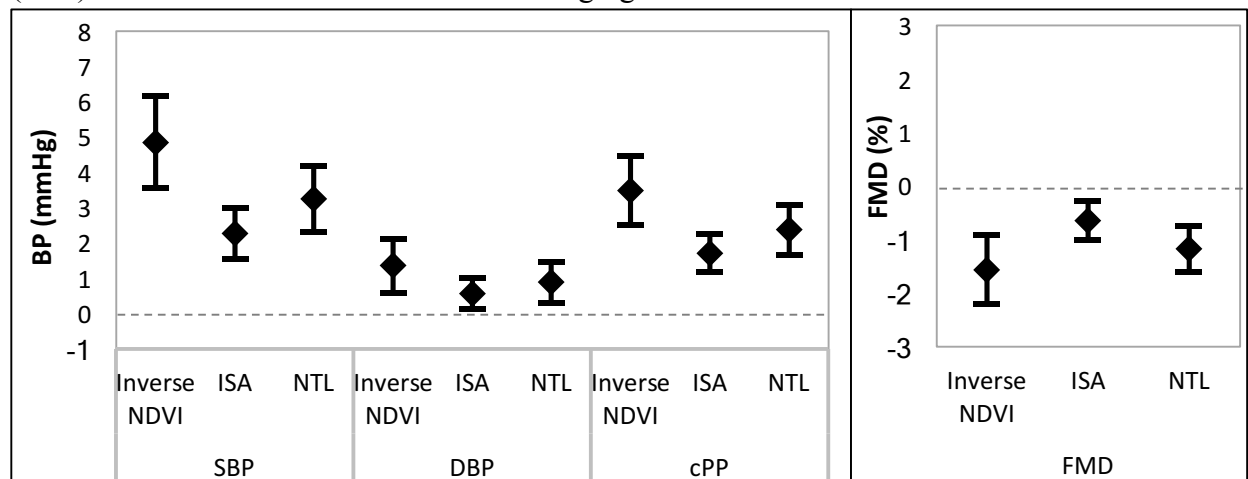

Adjusted for age, gender, BMI and smoking status.

Figure S2: Linear regression model for association between an interquartile range (IQR) increase in residential exposure to greenness (IQR = 0.17) on biomarkers of vascular aging stratified by low, moderate and high physical activity.

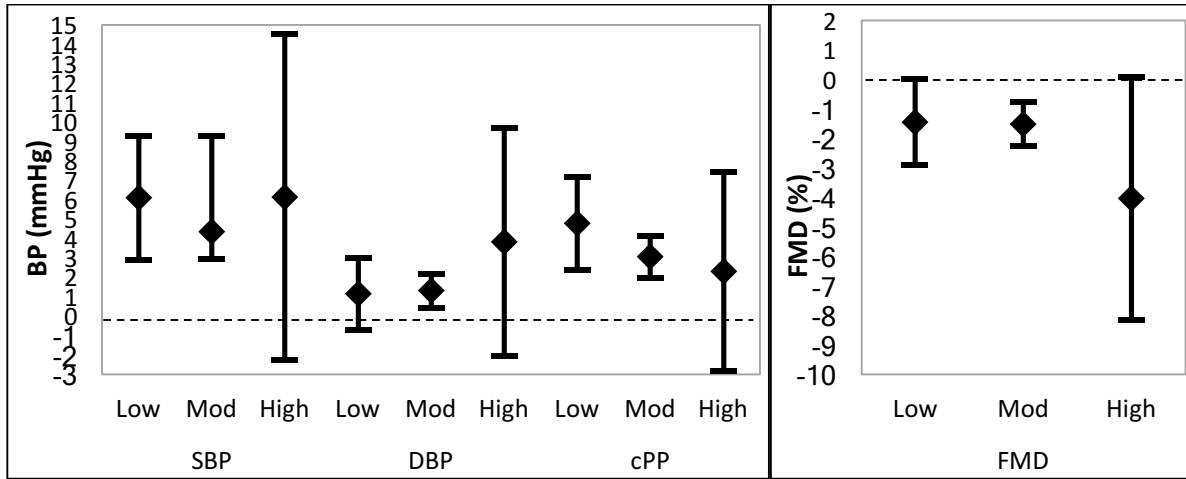

All models Adjusted for age, gender, BMI and smoking status. Moderate physical activity (Mod).
